# Supplementary material
Source: PubMed Central journal article supplement (PMC10425875)
Supplement: jamainternmed-e233300-s002.pdf [file jamainternmed-e233300-s002.pdf]

## Data Sharing Statement

Zhang. Comparison of Particulate Air Pollution From Different Emission Sources and Incident Dementia in the US. *JAMA Intern Med.* Published August 14, 2023.  
doi:10.1001/jamainternmed.2023.3300

### Data

**Data available:** No
